# Supplementary material for: Association of Restless Legs Syndrome With Risk of Suicide and Self-harm
Source: PubMed Central journal article supplement (PMC6714009; doi:10.1001/jamanetworkopen.2019.9966), 2019-08-23
Supplement: jamanetwopen-2-e199966-s001.pdf [file jamanetwopen-2-e199966-s001.pdf]

## Supplementary Online Content

Zhuang S, Na M, Winkelman JW, et al. Association of restless legs syndrome with risk of suicide and self-harm. *JAMA Netw Open*. 2019;2(8):e199966.  
doi:10.1001/jamanetworkopen.2019.9966

**eTable.** *ICD-9* Codes for Diseases and Conditions

This supplementary material has been provided by the authors to give readers additional information about their work.

**eTable. ICD-9 Codes for Diseases and Conditions**

| Name                   | ICD-9 code                                                                         |
|------------------------|------------------------------------------------------------------------------------|
| CVD                    | 36.0 <sup>a</sup> , 36.1 <sup>a</sup> , 410-413, 414.0, 414.8, 414.9, 428, 430-438 |
| Cancer                 | 140-172, 174-199.1, 200-208                                                        |
| Diabetes               | 250                                                                                |
| Hypertension           | 401-405                                                                            |
| Obesity                | 278.0                                                                              |
| Hyperlipidemia         | 272.2                                                                              |
| OSA                    | 327.2x, 780.57                                                                     |
| Depression             | 296.2, 296.3, 296.5, 296.6, 296.89, 300.4, 309.0, 309.1, 311                       |
| Insomnia               | 307.42, 780.52                                                                     |
| Peripheral neuropathy  | 356.x                                                                              |
| Rheumatologic disease  | 710.0, 710.1, 710.4, 714.0-714.2, 714.81, 725                                      |
| Osteoarthritis         | 715.x                                                                              |
| Iron deficiency anemia | 280                                                                                |
| CKD                    | 585.x                                                                              |
| Parkinson's disease    | 332                                                                                |

Abbreviations: ICD-9: International Classification of Diseases, Ninth Revision; CVD: cardiovascular disease; OSA: obstructive sleep apnea; CKD: chronic kidney disease.

<sup>a</sup> Identified by ICD-9 Clinical Modification Procedure Codes.
